# Supplementary material for: Unlocking weather observations from the Societas Meteorologica Palatina (1781–1792)
Source: Copernicus journal article supplement (doi:10.5194/cp-17-2361-2021), 2021-11-15
Supplement: Supplementary file 1 [file cp-17-2361-2021-supplement.zip]

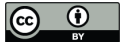

## *Supplement of*

# **Unlocking weather observations from the Societas Meteorologica Palatina (1781–1792)**

**Duncan Pappert et al.**

*Correspondence to:* Stefan Brönnimann (stefan.broennimann@giub.unibe.ch)

- cp-17-2361-2021-supplement-title-page.pdf
- Pappert-et-al-SMP-Supplement
  - Code+Additional
    - \* Case studies
    - \* ERA-5 means
    - \* craddock.R
    - \* freezcorr.R
    - \* homogenisation.R
    - \* przybylak-et-al-2014
  - Inventory\_SMP.csv
  - Palatina\_corr
    - \* 6\_Adjusted
    - \* 7\_Daily-series
    - \* 8\_Monthly-series
  - Palatina\_raw
    - \* 2\_Revised
    - \* 3\_Scripts
    - \* 4\_Formatted
    - \* 5\_QCed
  - Table\_SMP.csv
  - readme.txt

The copyright of individual parts of the supplement might differ from the article licence.
