# Supplementary figures and images for: Unlocking weather observations from the Societas Meteorologica Palatina (1781–1792)
Source: Copernicus journal article supplement (doi:10.5194/cp-17-2361-2021), 2021-11-15

# Daily mean temperature FMA 1785

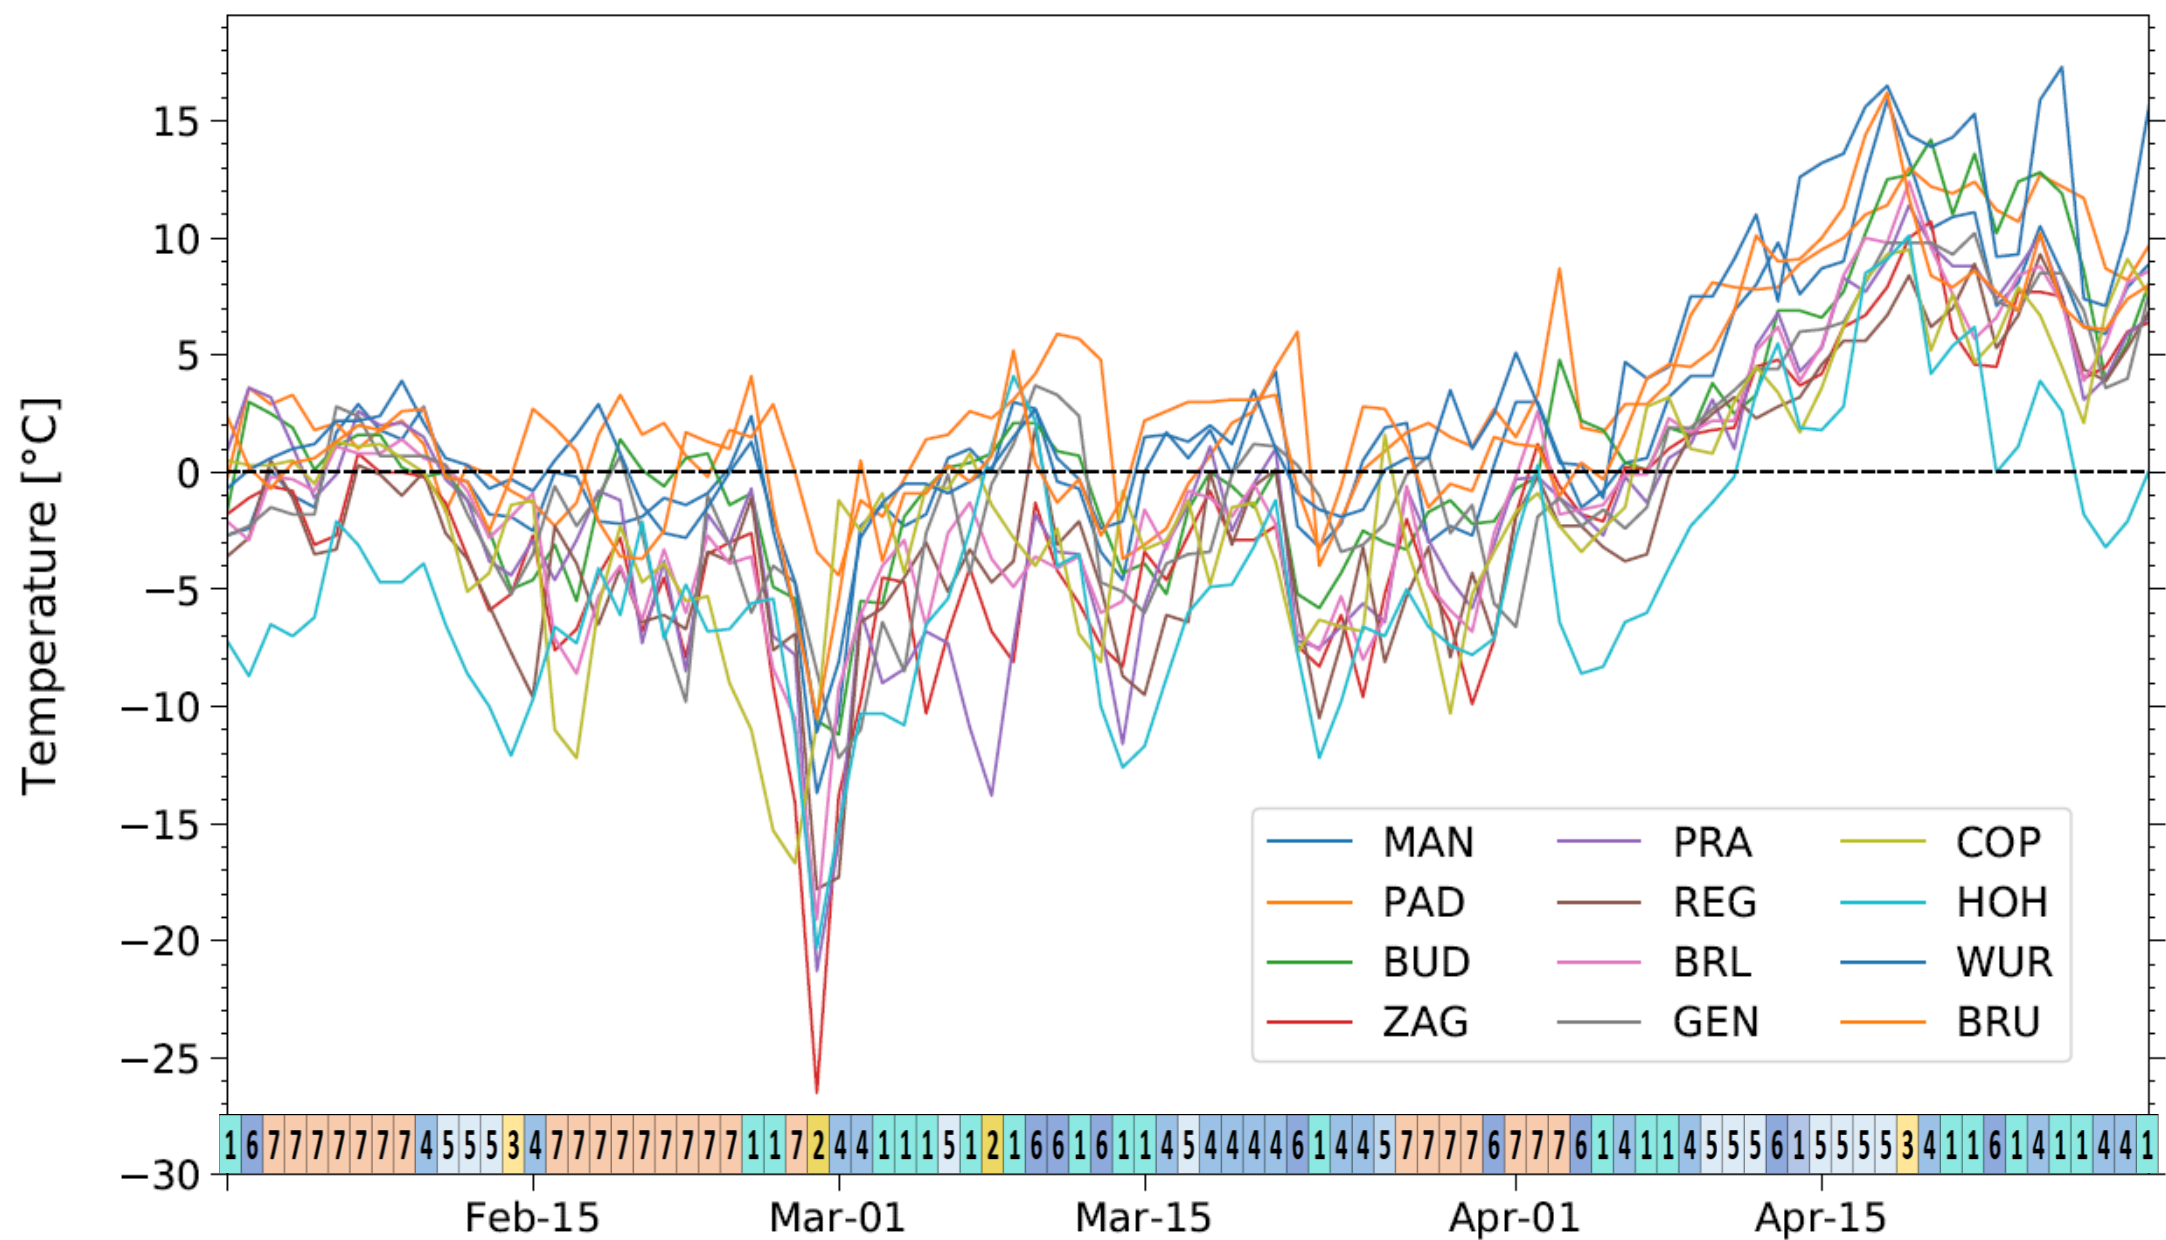

Supplement: Supplementary file 2 [file cp-17-2361-2021-supplement.zip]
